# Supplementary material for: MOF-derived ZnCo2O4 porous micro-rice with enhanced electro-catalytic activity for the oxygen evolution reaction and glucose oxidation
Source: Royal Society of Chemistry journal article supplement (doi:10.1039/c9ra08723k), 2020-01-01
Supplement: c9ra08723k1.pdf [file c9ra08723k1.pdf]

## Supporting Information

MOF-derived  $\text{ZnCo}_2\text{O}_4$  porous micro-rices with enhanced electrocatalytic activity for oxygen evolution reaction and glucose oxidation

Daojun Zhang,<sup>a,b\*</sup> Zimo Wang,<sup>a</sup> Jiakai Li,<sup>a</sup> Chengming Hu,<sup>a</sup> Xiaobei Zhang,<sup>b</sup> Bei Jiang,<sup>a</sup> Zhi Cao,<sup>a</sup> Jingchao Zhang,<sup>a</sup> Renchun Zhang<sup>a</sup>

<sup>a</sup> Henan Key Laboratory of New Optoelectronic Functional Materials, College of Chemistry and Chemical Engineering, Anyang Normal University, Anyang 455000, Henan, China

<sup>b</sup> College of Chemistry and Molecular Engineering, Zhengzhou University, 100 Science Road, Zhengzhou 450001, P. R. China

\* Corresponding author. Tel.: +86 372 2900040.

E-mail: zhangdj0410@sohu.com

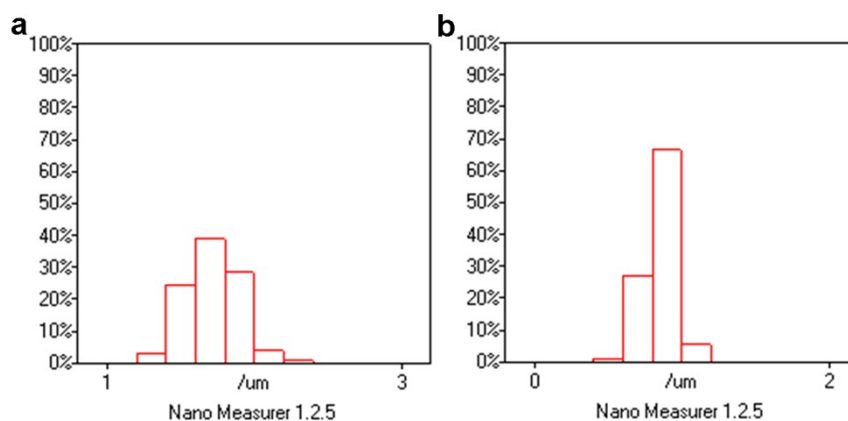

Fig.S1 The size distribution of micro-rice like  $\text{ZnCo}_2\text{O}_4$  precursors: (a) the length, (b) the width.

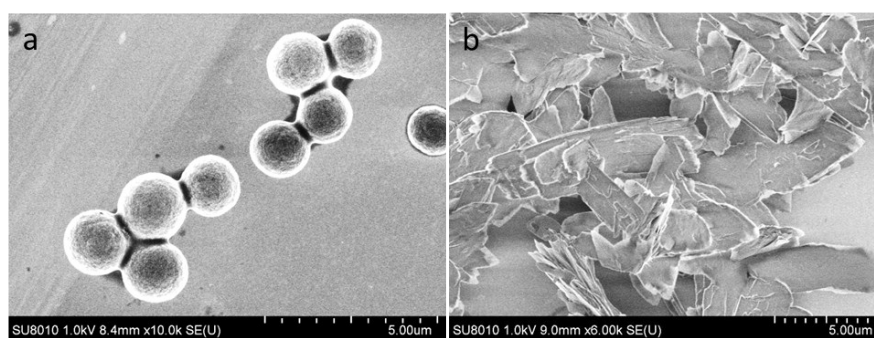

Fig.S2 The SEM image of product obtained with different Zn/Co ratio: (a) 0.09 mmol of  $\text{Zn}(\text{NO}_3)_2 \cdot 6\text{H}_2\text{O}$  (Zn/Co=1:0), (b) 0.03 mmol of  $\text{Zn}(\text{NO}_3)_2 \cdot 6\text{H}_2\text{O}$  and 0.27 mmol of  $\text{Co}(\text{NO}_3)_2 \cdot 6\text{H}_2\text{O}$  (Zn/Co=1:9).

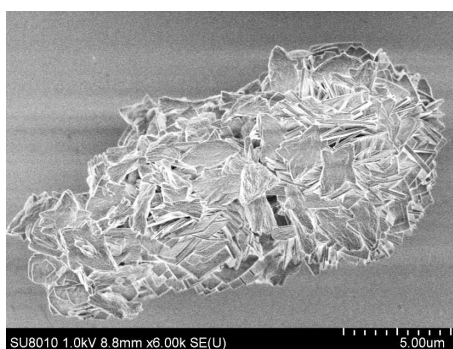

Fig.S3 The SEM image of product obtained by using 0.035 mmol p-phthalic acid (half of the initial dosage) and with other reaction parameters unchanged.

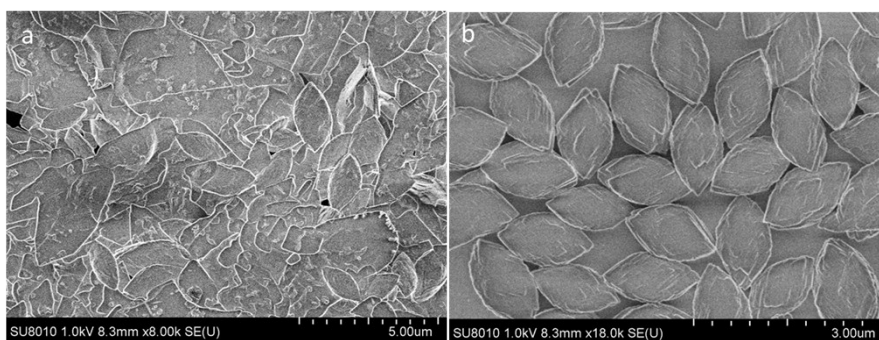

Fig.S4 The SEM image of samples obtained by different DMF and ethanol ratio: (a) 4 mL of DMF and 4 mL of ethanol, (b) 5 mL of DMF and 3 mL of ethanol.

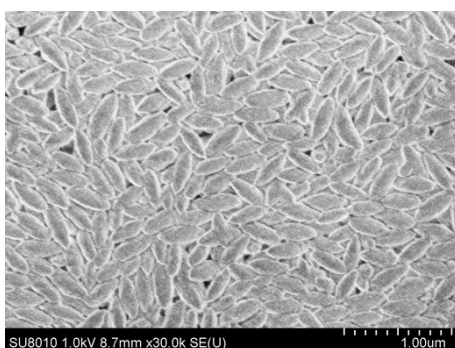

Fig.S5 The SEM image of spindle-like microparticles synthesized by using 5 mL of N, N-dimethylacetamide instead of isometric DMF, and kept other reaction conditions unchanged.

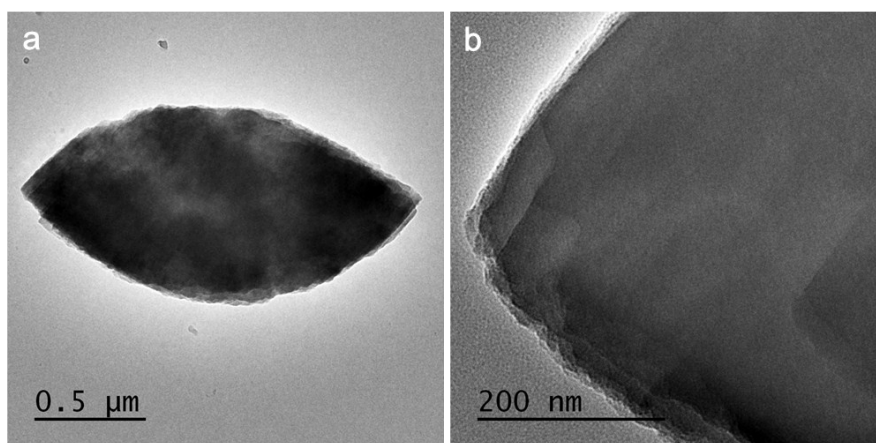

Fig.S6 The TEM images of Zn-Co-based MOF precursors.

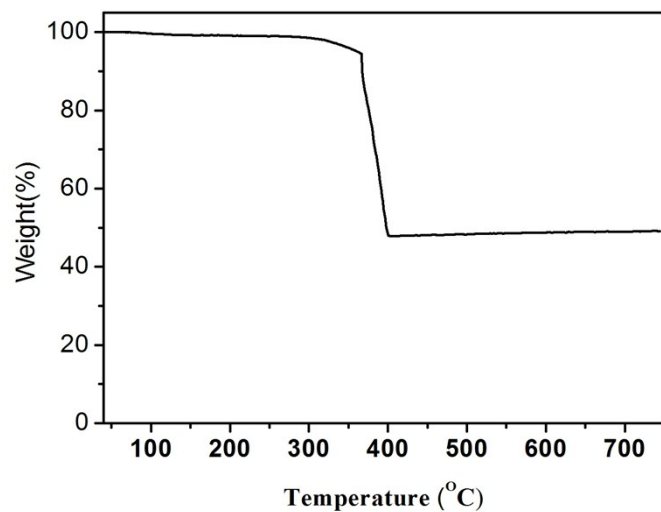

Fig.S7 TGA curve of micro-rice Zn-Co MOF precursors.

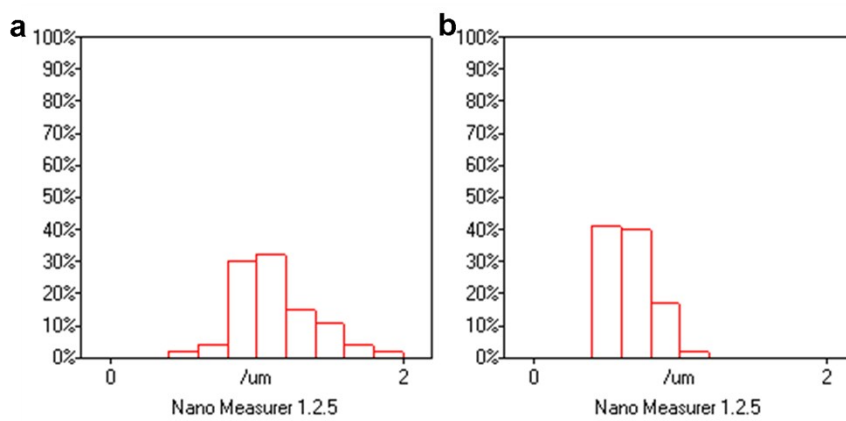

Fig.S8 The size distribution of the porous micro-rice like  $ZnCo_2O_4$ : (a) the length, (b) the width.
